# Supplementary material for: Neuroprotective effects of VCP modulators in mouse models of glaucoma
Source: PubMed Central journal article supplement (PMC4946081; doi:10.1016/j.heliyon.2016.e00096), 2016-04-19
Supplement: mmc1.pdf [file mmc1.pdf]

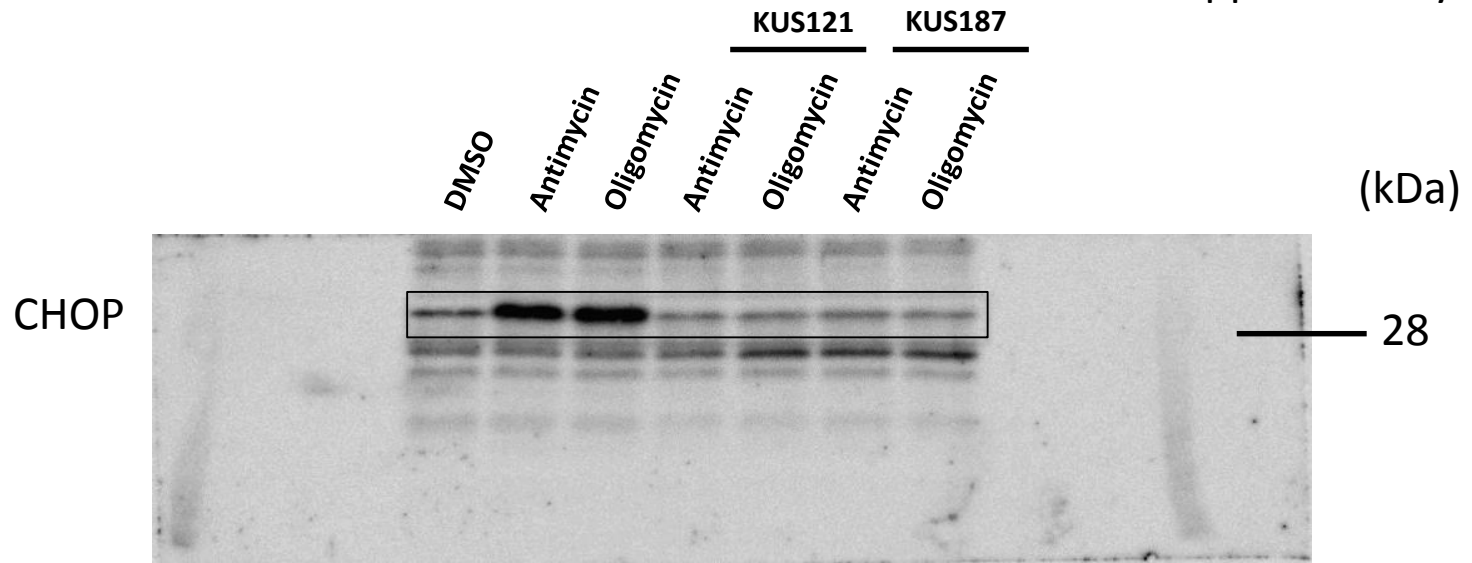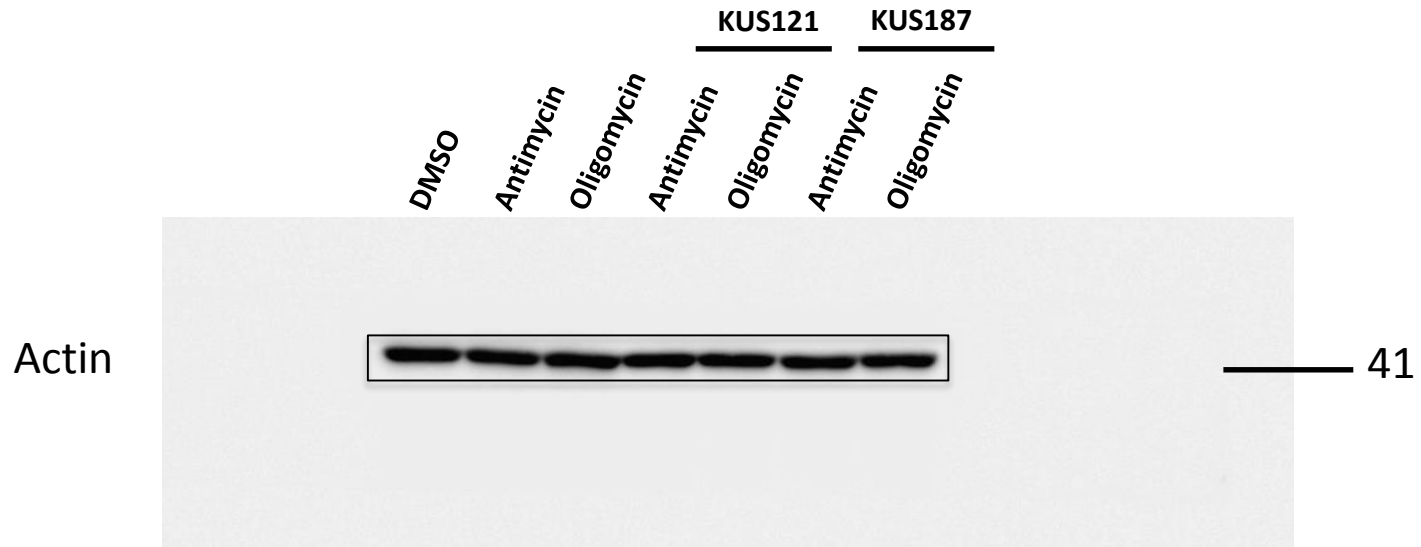

Figure 1B

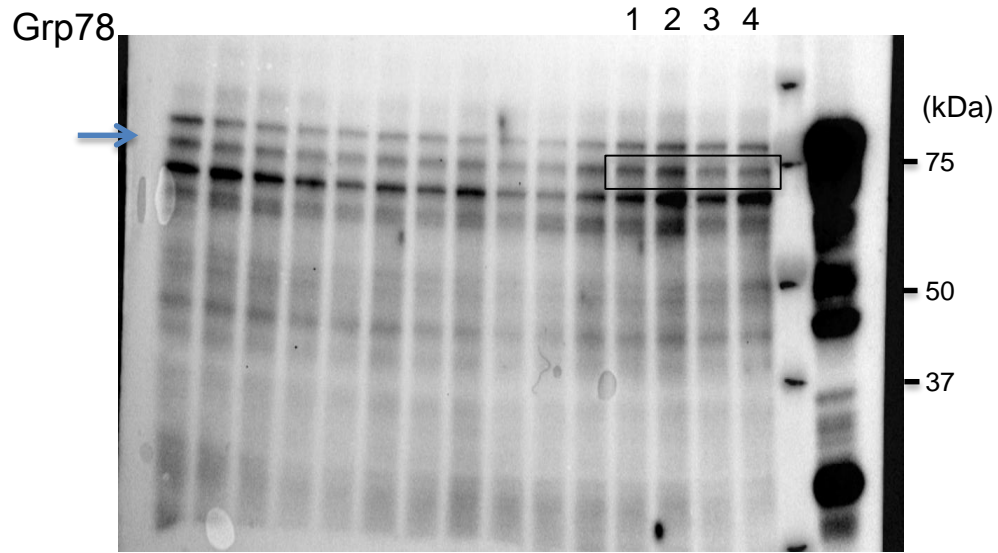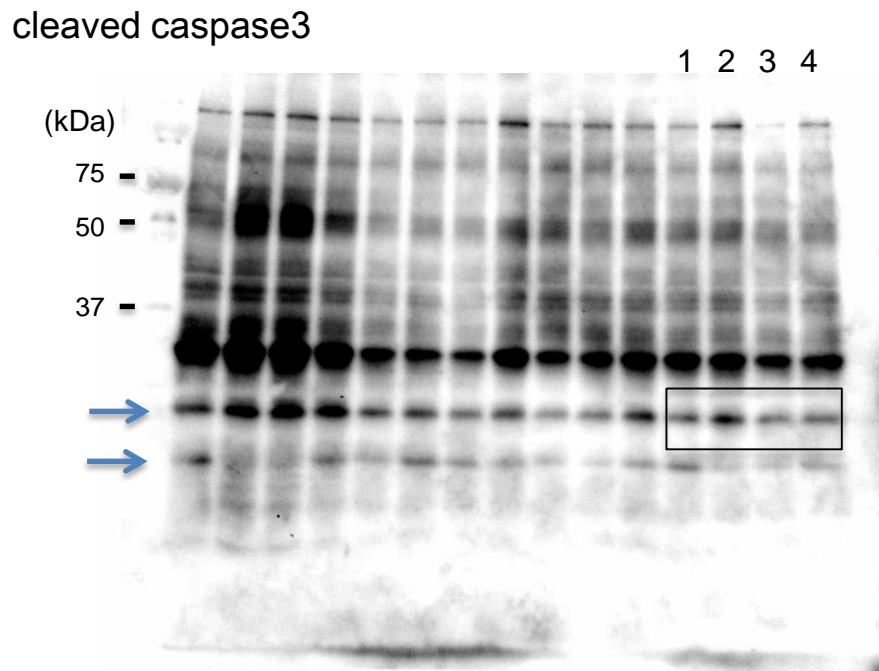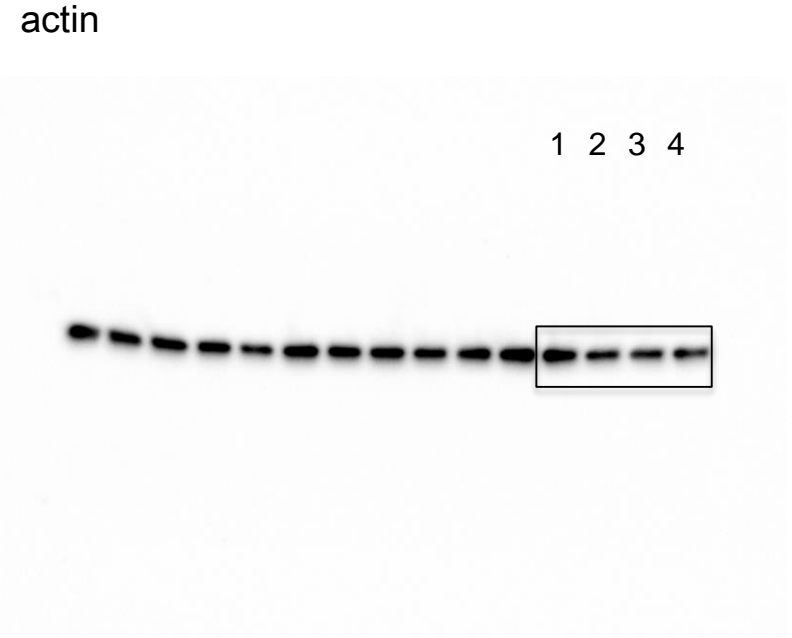

Figure 5A

NF- $\kappa$ B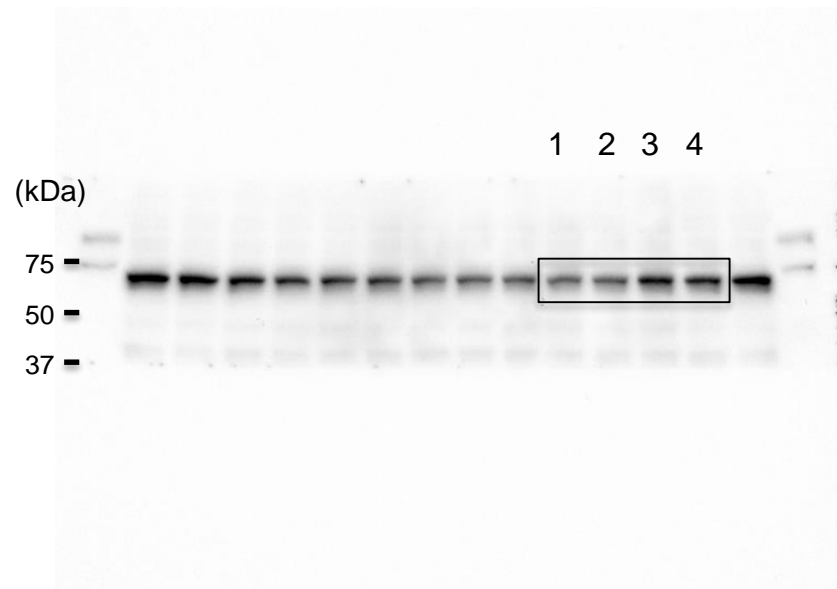

pSTAT

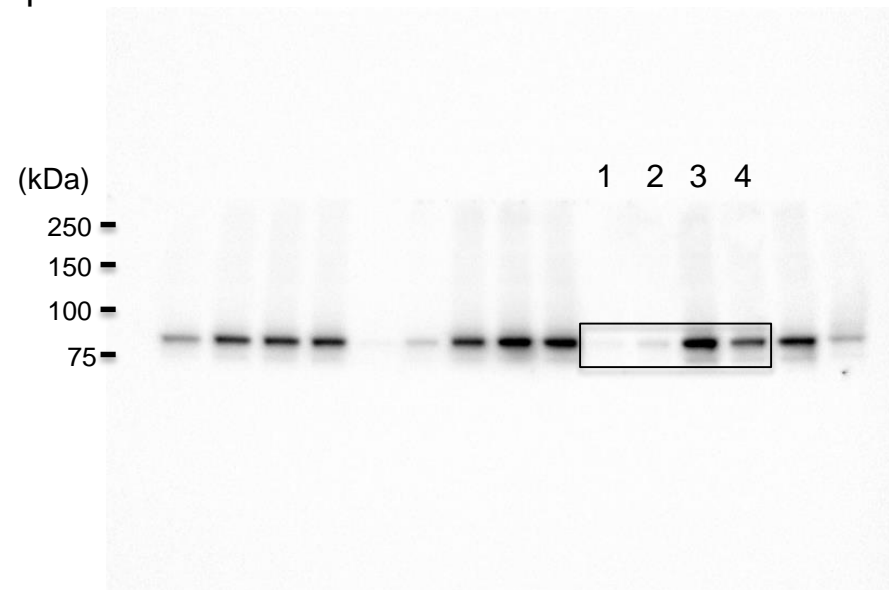

pJNK

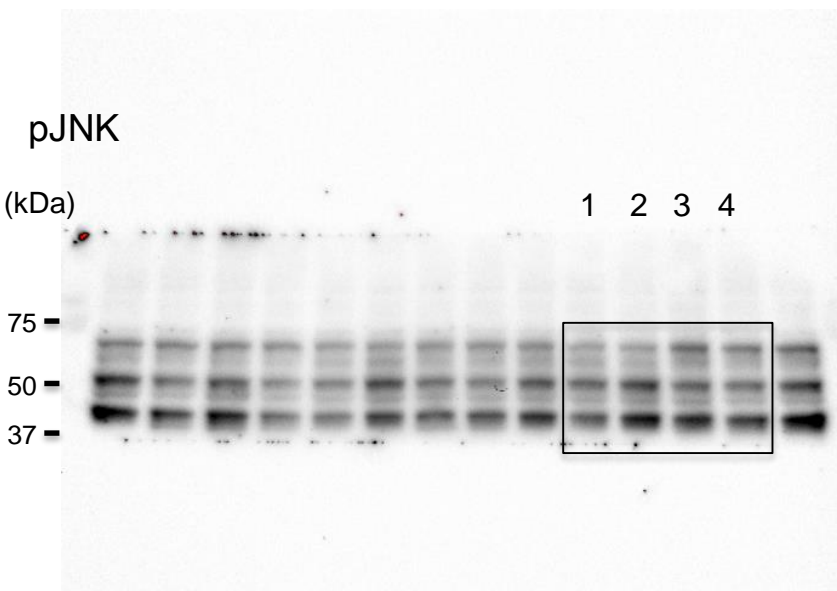

actin

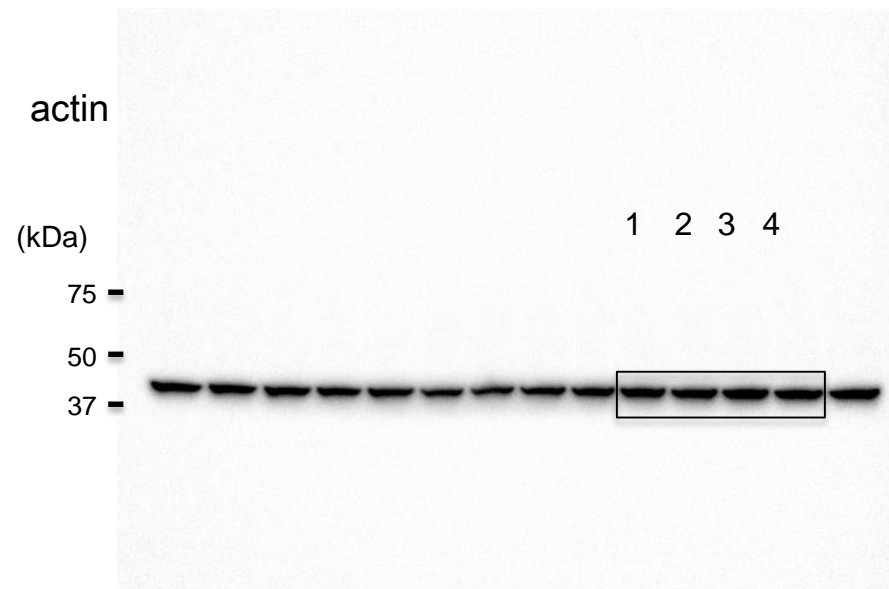

Figure 5D

### **Supplementary Figure Legends**

**Supplementary Fig S1.** Complete scans of the different gels presented in the Figure 1B.

**Supplementary Fig S2.** Complete scans of the different gels presented in the Figure 5A. Lane 1: saline injection, lane 2-4: NMDA injection, lane 2: PBS treatment (labeled “C”), lane 3: KUS121 treatment (K121), lane 4: KUS187 treatment (K187).

**Supplementary Fig S3.** Complete scans of the different gels presented in the Figure 5D. Lane 1: wild type (WT), lane 2: saline injection, lane 3: PBS treatment (labeled “C”) with NMDA injection, lane 4: KUS121 treatment with NMDA injection.
